# Supplementary material
Source: Springer Nature journal article supplement (https://www.springermedizin.de/resource/supplementary/12936_2011_1972_MOESM4_ESM.pdf/9542148)
Supplement: MOESM4 [file 9542148]

|                                | 10      | 20   | 30      | 40  | 50    | 60         |
|--------------------------------|---------|------|---------|-----|-------|------------|
| Sudan, Sud-60-93-11 isolate    | CAAAGCC | TGCA | GATGCTG | TAA | GTACT | CAAAAGTGCT |
| Laos, RO33 type 1 (n=66)*      | CAAAGCC | TGCA | GATGCTG | TAA | GTACT | CAAAAGTGCT |
| Savannakhet, RO33 type 2 (n=1) |         |      |         |     | TGT   |            |
| Savannakhet, RO33 type 3 (n=1) |         |      |         |     | T     | G          |
| Savannakhet, RO33 type 4 (n=1) |         |      |         |     | AG    |            |
| Savannakhet, RO33 type 5 (n=1) |         |      |         |     | A     | G          |
| Xekong, RO33 type 6 (n=1)      |         |      |         |     |       | CAA        |
| Xekong, RO33 type 7 (n=1)      |         |      |         |     |       |            |
| Thailand, clone 814C           |         |      |         |     |       |            |
| Thailand, isolate T838         |         |      |         |     |       |            |
| Cambodia, Cam84I-5 isolate     |         |      |         |     |       |            |
| Indonesia, isolate 4/M1        |         |      |         |     |       |            |
| India, RDTCF002                |         |      |         |     |       |            |
| Iran, isolate CH10             |         |      |         |     |       |            |
| Malawi, 2/040-1-8 isolate      |         |      |         |     |       |            |
| Malawi, 2/041-3-1 isolate      |         |      |         |     |       |            |
| Sudan, Sud-60-93-3             |         |      |         |     |       |            |
| Tanzania, isolate IFA17.29     |         |      |         |     |       |            |
| West Africa PFAMS1 isolate     |         |      |         |     |       |            |
| Ghana, isolate RO33            |         |      |         |     |       |            |
| Brazil, 7G8 isolate            |         |      |         |     |       |            |
| Peru, RO33-140.1 isolate       |         |      |         |     |       |            |

|                                | 70      | 80      | 90       |
|--------------------------------|---------|---------|----------|
| Sudan, Sud-60-93-11 isolate    | CTTCAGG | TACTGCA | AGTACTAA |
| Laos, RO33 type 1 (n=66)*      | CTTCAGG | TACTGCA | AGTACTAA |
| Savannakhet, RO33 type 2 (n=1) |         |         |          |
| Savannakhet, RO33 type 3 (n=1) |         |         |          |
| Savannakhet, RO33 type 4 (n=1) |         |         |          |
| Savannakhet, RO33 type 5 (n=1) |         |         |          |
| Xekong, RO33 type 6 (n=1)      |         |         |          |
| Xekong, RO33 type 7 (n=1)      |         |         | TG       |
| Thailand, clone 814C           |         |         |          |
| Thailand, isolate T838         |         |         |          |
| Cambodia, Cam84I-5 isolate     |         |         |          |
| Indonesia, isolate 4/M1        |         |         |          |
| India, RDTCF002                |         |         |          |
| Iran, isolate CH10             |         |         |          |
| Malawi, 2/040-1-8 isolate      |         |         |          |
| Malawi, 2/041-3-1 isolate      |         |         |          |
| Sudan, Sud-60-93-3             |         |         |          |
| Tanzania, isolate IFA17.29     |         |         |          |
| West Africa PFAMS1 isolate     |         |         |          |
| Ghana, isolate RO33            |         |         |          |
| Brazil, 7G8 isolate            |         |         |          |
| Peru, RO33-140.1 isolate       |         |         |          |

\* 10 sequences of Laos, RO33 type 1 derived from sequence analysis (2 from Oudomxay, 5 from Savannakhet and 3 from Xekong), 56 sequences were expected from SSCP screening.
